# Supplementary material
Source: HighWire-hosted journal article supplement (https://www.cmaj.ca/highwire/filestream/77878/field_highwire_adjunct_files/0/200274-res-1-at.pdf)
Supplement: 200274-res-1-at.pdf [file 200274-res-1-at.pdf]

## **Appendix 1 (as supplied by the authors)**

### **Definition of mental health and addiction-related costs**

Costs related to mental health and addiction care were defined in line with previous work.<sup>1</sup> These included all costs of psychiatric hospitalizations captured in the Ontario Mental Health Reporting System; hospitalizations with an *International Classification of Diseases, Tenth Revision (ICD-10)* diagnosis code for mental health and addiction (F00-F99) included in the Discharge Abstract Database; emergency department (ED) visits with ICD-10 diagnosis codes for mental health and addiction (F00-F99) and self-harm (X60-X84; Y10-Y19, Y28) included in the National Ambulatory Care Reporting System; psychiatrist billings and primary care physician billings related to mental health and addiction care, selected from the Ontario Health Insurance Plan claims database using a validated algorithm;<sup>2</sup> electroconvulsive therapy procedures codes and serum lithium lab claims from the Ontario Health Insurance Plan claims database; outpatient prescription drugs for psychiatric disorders (e.g. antidepressants, antipsychotics, and mood stabilizers) covered under the public provincial drug plan, the Ontario Drug Benefit Program; and home care psychology services (e.g. psychosocial nursing care) included in the Home Care Database. All other costs were defined as non-mental health and addiction care costs.

### **Description of costing methodology**

We used a cost estimation algorithm, available at ICES, to estimate all direct health care costs incurred by patients and borne by the public third-party payer, the Ontario Ministry of Health.<sup>3</sup> This algorithm estimates costs associated with hospitalizations (both acute and psychiatric), ED visits and other ambulatory care, outpatient clinic visits, physician visits and outpatient care, outpatient prescription drugs (covered under the public provincial drug plan), inpatient rehabilitation, complex continuing care, long-term care, and home care. The cost of hospital encounters, such as inpatient hospitalizations, same-day surgeries and emergency department visits, etc., was obtained by multiplying the respective encounter-specific resource intensity weight, a measure of utilisation, by the corresponding average cost per standard encounter/visit. For other institution-based care with long stays, such as psychiatric hospitalizations and long-term care, a similar

Appendix to: de Oliveira C, Mason J, Kurdyak P. Characteristics of patients with mental illness and persistent high-cost status: a population-based analysis. *CMAJ* 2020. doi: 10.1503/cmaj.200274. Copyright © 2020 The Author(s) or their employer(s).

To receive this resource in an accessible format, please contact us at [cmajgroup@cmaj.ca](mailto:cmajgroup@cmaj.ca).

costing approach, which accounted for length of stay, was used. The cost of physician services was estimated by multiplying each physician billing code by their respective unit cost. Shadow billings were estimated for cases where a fee-for-service was not applicable. The cost of outpatient prescription drugs was estimated by multiplying the number of drugs by their respective unit cost. For other care, such as home care, the cost was obtained by multiplying the number of services by a service-specific average cost obtained from the Ministry of Health. The costs captured by the algorithm account for over 90% of all government paid costs associated with health care services.<sup>4</sup> Costs were categorised into the following categories: psychiatric hospitalizations, acute care hospitalizations, other hospital/institution-based care (i.e., inpatient rehabilitation, complex continuing care and long-term care), hospital outpatient clinic visits, ED visits, other ambulatory care (i.e., same-day surgery, dialysis clinic visits and cancer clinic visits), physician services, outpatient prescription drugs covered under the public provincial drug plan (i.e., for individuals 65 and older, and those on social assistance), and home care. All costs were reported in 2018 Canadian dollars.

### **Cost analyses**

We estimated total mean health care costs in 2010 by high-cost and health service categories. We also estimated the costs of potentially preventable acute care for each group, defined as costs of potentially preventable acute care hospitalizations (determined through the Agency for Healthcare Research and Quality's Prevention Quality Indicators)<sup>5</sup> and potentially preventable ED visits (determined through the Billings et al. (2000) algorithm,<sup>8</sup> updated by Johnston et al. (2017)).<sup>6</sup> The Prevention Quality Indicators define potentially preventable acute care hospitalizations as those for conditions which good outpatient care can likely prevent the need for hospitalization (e.g. bacterial pneumonia or diabetes),<sup>7</sup> while the Billings-Johnston algorithm classifies ED visits into those considered preventable (i.e., non-emergent, emergent/primary care treatable, and emergent/emergency department care needed but preventable) and not preventable (i.e., emergency department care needed but not preventable, alcohol use, drug use, injury and mental health).<sup>6,7</sup> We also estimated total costs by high-cost group for each year to understand how these changed over time.

## References

1. de Oliveira C, Cheng J, Vigod S, Rehm J, Kurdyak P. Patients with High Mental Health Costs Incur Over 30 Percent More Costs than Other High Cost Patients, *Health Aff (Millwood)*. 2016; 35(1):36–43.
2. Steele LS, Glazier RH, Lin E, Evans M. Using administrative data to measure ambulatory mental health service provision in primary care. *Med Care*. 2004; 42(10):960–5.
3. Wodchis W, Bushmeneva K, Nikitovic M, et al. Guidelines on person-level costing using administrative databases in Ontario: working paper series volume 1 May 2013. Toronto: Health System Performance Research Network; 2013.
4. Wodchis WP, Austin PC, Henry DA. A 3-year study of high-cost users of health care. *CMAJ*. 2016; 188(3):182-188.
5. Prevention Quality Indicators overview – Agency for Healthcare Research and Quality. Rockville (MD): Agency for Healthcare Research and Quality. Available: [https://www.qualityindicators.ahrq.gov/Modules/pqi\\_resources.aspx](https://www.qualityindicators.ahrq.gov/Modules/pqi_resources.aspx) (accessed 2020 May 8).
6. Billings J, Parikh N, Mijanovich T. Emergency department use: the New York Story. *Issue Brief (Commonw Fund)*. 2000;(434):1-12.
7. Johnston KJ, Allen L, Melanson TA, Pitts SR. A "Patch" to the NYU Emergency Department Visit Algorithm. *Health Serv Res*. 2017;52(4):1264-1276.

**Table A1.** Summary of administrative health care databases

| <b>Database</b>                               | <b>Setting</b>                                                        | <b>Description</b>                                                                                                                                                                                                                                                                                                                  |
|-----------------------------------------------|-----------------------------------------------------------------------|-------------------------------------------------------------------------------------------------------------------------------------------------------------------------------------------------------------------------------------------------------------------------------------------------------------------------------------|
| Discharge Abstract Database                   | acute care hospitalisations                                           | The Discharge Abstract Database is a national database, which contains demographic and clinical data on all acute care inpatient hospitalisations. It also includes psychiatric inpatient hospitalisations for children and adolescents and psychiatric inpatient hospitalisations, which occur in non-psychiatric designated beds. |
| Ontario Mental Health Reporting System        | psychiatric hospitalisations                                          | The Ontario Mental Health Reporting System collects demographic and clinical data on all adult psychiatric inpatient hospitalisations in Ontario.                                                                                                                                                                                   |
| Continuing Care Reporting System              | complex continuing care, long-term care                               | The Continuing Care Reporting System contains demographic and clinical information on individuals receiving facility-based continuing care. These services include medical long-term care, rehabilitation, geriatric assessment, respite palliative care, and nursing home care.                                                    |
| National Rehabilitation Reporting System      | rehabilitation                                                        | The National Rehabilitation Reporting System contains national data on rehabilitation facilities and clients, collected from participating adult inpatient rehabilitation facilities and programs.                                                                                                                                  |
| National Ambulatory Care Reporting System     | emergency department visits, day surgery and outpatient clinic visits | The National Ambulatory Care Reporting System contains data on all ambulatory care including emergency department visits, day surgery and outpatient clinic visits (for example, chemotherapy and dialysis).                                                                                                                        |
| Ontario Health Insurance Plan Claims Database | outpatient and physician services                                     | The Ontario Health Insurance Plan Claims Database covers all services and procedures provided by health care providers who can claim under the Ontario Health Insurance Plan (such as, physician and laboratory/diagnostic services).                                                                                               |
| Ontario Drug Benefit Claims Database          | outpatient prescription drugs                                         | The Ontario Drug Benefit Claims Database includes data on all drugs dispensed in community pharmacies and long-term care/nursing facilities. The Ontario Drug Benefit program covers prescription drugs listed in the provincial formulary for all seniors (aged 65+) as well as those under the age of 65 on social assistance.    |
| Home Care Database                            | home care                                                             | The Home Care Database provide data on government-funded services coordinated by Ontario's Community Care Access Centres for individuals requiring home care.                                                                                                                                                                       |

**Table A2.** Mean health care costs (and 95% confidence intervals) by high-cost patient group and health service, 2010-2017

|                                               | <b>Sporadic</b><br>n=17,746 | <b>Lower</b><br><b>CI</b> | <b>Upper</b><br><b>CI</b> | <b>Moderate</b><br>n=16,743 | <b>Lower</b><br><b>CI</b> | <b>Upper</b><br><b>CI</b> | <b>Persistent</b><br>n=18,149 | <b>Lower</b><br><b>CI</b> | <b>Upper</b><br><b>CI</b> |
|-----------------------------------------------|-----------------------------|---------------------------|---------------------------|-----------------------------|---------------------------|---------------------------|-------------------------------|---------------------------|---------------------------|
| <b>Psychiatric hospitalisations</b>           |                             |                           |                           |                             |                           |                           |                               |                           |                           |
| <b>2010</b>                                   | 14,417                      | 13,983                    | 14,852                    | 19,834                      | 19,166                    | 20,503                    | 30,944                        | 29,956                    | 31,932                    |
| <b>2011</b>                                   | 2,072                       | 1,870                     | 2,274                     | 11,790                      | 11,145                    | 12,435                    | 25,977                        | 24,974                    | 26,980                    |
| <b>2012</b>                                   | 492                         | 417                       | 567                       | 8,042                       | 7,505                     | 8,579                     | 24,033                        | 23,034                    | 25,032                    |
| <b>2013</b>                                   | 250                         | 203                       | 296                       | 4,633                       | 4,261                     | 5,005                     | 20,682                        | 19,793                    | 21,571                    |
| <b>2014</b>                                   | 234                         | 192                       | 275                       | 3,190                       | 2,937                     | 3,443                     | 20,112                        | 19,212                    | 21,012                    |
| <b>2015</b>                                   | 223                         | 175                       | 270                       | 2,884                       | 2,636                     | 3,132                     | 19,579                        | 18,668                    | 20,490                    |
| <b>2016</b>                                   | 204                         | 163                       | 245                       | 3,058                       | 2,789                     | 3,326                     | 18,794                        | 17,871                    | 19,716                    |
| <b>2017</b>                                   | 320                         | 248                       | 392                       | 3,298                       | 2,989                     | 3,607                     | 18,301                        | 17,353                    | 19,249                    |
| <b>Acute care hospitalisations</b>            |                             |                           |                           |                             |                           |                           |                               |                           |                           |
| <b>2010</b>                                   | 408                         | 377                       | 439                       | 587                         | 542                       | 632                       | 612                           | 568                       | 657                       |
| <b>2011</b>                                   | 302                         | 249                       | 355                       | 1585                        | 1438                      | 1731                      | 1556                          | 1439                      | 1674                      |
| <b>2012</b>                                   | 177                         | 138                       | 216                       | 1414                        | 1288                      | 1541                      | 1768                          | 1605                      | 1931                      |
| <b>2013</b>                                   | 145                         | 116                       | 173                       | 1271                        | 1142                      | 1400                      | 2037                          | 1891                      | 2183                      |
| <b>2014</b>                                   | 149                         | 123                       | 175                       | 1108                        | 991                       | 1226                      | 2239                          | 2056                      | 2423                      |
| <b>2015</b>                                   | 153                         | 130                       | 176                       | 1006                        | 906                       | 1106                      | 2300                          | 2120                      | 2480                      |
| <b>2016</b>                                   | 186                         | 157                       | 215                       | 1121                        | 1005                      | 1238                      | 2307                          | 2133                      | 2481                      |
| <b>2017</b>                                   | 257                         | 198                       | 316                       | 1217                        | 1082                      | 1352                      | 2148                          | 1979                      | 2317                      |
| <b>Other hospital/institution-based care*</b> |                             |                           |                           |                             |                           |                           |                               |                           |                           |
| <b>2010</b>                                   | 167                         | 135                       | 199                       | 308                         | 266                       | 351                       | 372                           | 324                       | 419                       |
| <b>2011</b>                                   | 80                          | 54                        | 106                       | 1,436                       | 1,304                     | 1,568                     | 1,634                         | 1,502                     | 1,767                     |
| <b>2012</b>                                   | 20                          | 9                         | 31                        | 1,474                       | 1,331                     | 1,617                     | 2,271                         | 2,109                     | 2,432                     |
| <b>2013</b>                                   | 3                           | -1                        | 5                         | 1,092                       | 960                       | 1,223                     | 2,716                         | 2,538                     | 2,894                     |
| <b>2014</b>                                   | 12                          | 2                         | 22                        | 366                         | 299                       | 433                       | 3,262                         | 3,073                     | 3,452                     |

|                                          |       |       |       |       |       |       |       |       |       |
|------------------------------------------|-------|-------|-------|-------|-------|-------|-------|-------|-------|
| <b>2015</b>                              | 7     | 2     | 12    | 276   | 221   | 331   | 3,388 | 3,189 | 3,588 |
| <b>2016</b>                              | 14    | 6     | 23    | 327   | 266   | 388   | 3,426 | 3,228 | 3,625 |
| <b>2017</b>                              | 36    | 19    | 54    | 575   | 468   | 682   | 3,311 | 3,097 | 3,525 |
| <b>Hospital outpatient clinic visits</b> |       |       |       |       |       |       |       |       |       |
| <b>2010</b>                              | 2,190 | 2,145 | 2,235 | 2,487 | 2,434 | 2,540 | 2,666 | 2,608 | 2,724 |
| <b>2011</b>                              | 547   | 530   | 563   | 2,128 | 2,076 | 2,180 | 2,706 | 2,644 | 2,769 |
| <b>2012</b>                              | 421   | 407   | 435   | 1,658 | 1,615 | 1,701 | 2,529 | 2,470 | 2,587 |
| <b>2013</b>                              | 359   | 346   | 371   | 1,314 | 1,279 | 1,349 | 2,357 | 2,303 | 2,412 |
| <b>2014</b>                              | 333   | 322   | 345   | 1,056 | 1,028 | 1,085 | 2,173 | 2,122 | 2,224 |
| <b>2015</b>                              | 305   | 294   | 317   | 918   | 893   | 943   | 2,048 | 2,000 | 2,096 |
| <b>2016</b>                              | 313   | 302   | 325   | 887   | 861   | 912   | 1,942 | 1,895 | 1,988 |
| <b>2017</b>                              | 547   | 530   | 563   | 850   | 825   | 875   | 1,824 | 1,775 | 1,874 |
| <b>Emergency department visits</b>       |       |       |       |       |       |       |       |       |       |
| <b>2010</b>                              | 674   | 659   | 690   | 777   | 757   | 796   | 844   | 819   | 870   |
| <b>2011</b>                              | 216   | 206   | 225   | 544   | 524   | 563   | 770   | 744   | 795   |
| <b>2012</b>                              | 158   | 153   | 164   | 494   | 475   | 513   | 765   | 739   | 791   |
| <b>2013</b>                              | 142   | 136   | 147   | 444   | 425   | 462   | 794   | 765   | 823   |
| <b>2014</b>                              | 137   | 132   | 143   | 375   | 361   | 388   | 783   | 753   | 813   |
| <b>2015</b>                              | 134   | 129   | 140   | 340   | 328   | 351   | 767   | 737   | 798   |
| <b>2016</b>                              | 133   | 128   | 138   | 349   | 336   | 362   | 744   | 710   | 777   |
| <b>2017</b>                              | 145   | 140   | 151   | 370   | 354   | 385   | 732   | 696   | 768   |
| <b>Other ambulatory care**</b>           |       |       |       |       |       |       |       |       |       |
| <b>2010</b>                              | 123   | 115   | 131   | 169   | 147   | 191   | 171   | 158   | 185   |
| <b>2011</b>                              | 99    | 87    | 110   | 271   | 241   | 300   | 253   | 230   | 276   |
| <b>2012</b>                              | 76    | 70    | 82    | 283   | 250   | 316   | 397   | 357   | 437   |
| <b>2013</b>                              | 78    | 71    | 86    | 291   | 253   | 328   | 429   | 385   | 473   |

|                                         |       |       |       |       |       |       |       |       |       |
|-----------------------------------------|-------|-------|-------|-------|-------|-------|-------|-------|-------|
| <b>2014</b>                             | 82    | 72    | 92    | 252   | 220   | 283   | 438   | 390   | 485   |
| <b>2015</b>                             | 72    | 66    | 78    | 258   | 220   | 295   | 468   | 414   | 522   |
| <b>2016</b>                             | 79    | 72    | 86    | 292   | 256   | 327   | 505   | 445   | 565   |
| <b>2017</b>                             | 102   | 91    | 113   | 305   | 264   | 346   | 517   | 452   | 582   |
| <b>Physician services</b>               |       |       |       |       |       |       |       |       |       |
| <b>2010</b>                             | 4,380 | 4,318 | 4,442 | 5,229 | 5,148 | 5,311 | 5,818 | 5,734 | 5,902 |
| <b>2011</b>                             | 2,148 | 2,105 | 2,191 | 4,356 | 4,285 | 4,426 | 5,742 | 5,647 | 5,836 |
| <b>2012</b>                             | 1,413 | 1,386 | 1,439 | 3,794 | 3,729 | 3,860 | 5,665 | 5,571 | 5,760 |
| <b>2013</b>                             | 1,195 | 1,173 | 1,218 | 3,211 | 3,119 | 3,302 | 5,490 | 5,404 | 5,576 |
| <b>2014</b>                             | 1,100 | 1,079 | 1,120 | 2,659 | 2,612 | 2,706 | 5,221 | 5,135 | 5,307 |
| <b>2015</b>                             | 1,055 | 1,035 | 1,075 | 2,445 | 2,400 | 2,490 | 5,068 | 4,987 | 5,148 |
| <b>2016</b>                             | 1,019 | 1,000 | 1,038 | 2,399 | 2,352 | 2,447 | 4,870 | 4,789 | 4,952 |
| <b>2017</b>                             | 1,047 | 1,025 | 1,068 | 2,339 | 2,291 | 2,388 | 4,496 | 4,417 | 4,575 |
| <b>Outpatient prescription drugs***</b> |       |       |       |       |       |       |       |       |       |
| <b>2010</b>                             | 702   | 679   | 725   | 1,392 | 1,357 | 1,427 | 2,947 | 2,893 | 3,000 |
| <b>2011</b>                             | 574   | 555   | 592   | 1,540 | 1,503 | 1,577 | 3,342 | 3,284 | 3,400 |
| <b>2012</b>                             | 537   | 520   | 554   | 1,622 | 1,583 | 1,661 | 3,914 | 3,845 | 3,983 |
| <b>2013</b>                             | 536   | 518   | 554   | 1,574 | 1,537 | 1,612 | 4,351 | 4,276 | 4,427 |
| <b>2014</b>                             | 520   | 504   | 537   | 1,463 | 1,428 | 1,498 | 4,664 | 4,584 | 4,743 |
| <b>2015</b>                             | 522   | 495   | 549   | 1,516 | 1,461 | 1,571 | 4,958 | 4,864 | 5,051 |
| <b>2016</b>                             | 520   | 496   | 544   | 1,645 | 1,575 | 1,715 | 5,220 | 5,108 | 5,333 |
| <b>2017</b>                             | 567   | 534   | 599   | 1,805 | 1,726 | 1,884 | 5,340 | 5,218 | 5,463 |
| <b>Home care</b>                        |       |       |       |       |       |       |       |       |       |
| <b>2010</b>                             | 144   | 133   | 155   | 272   | 254   | 290   | 339   | 318   | 360   |
| <b>2011</b>                             | 48    | 41    | 55    | 348   | 314   | 382   | 472   | 438   | 505   |
| <b>2012</b>                             | 24    | 20    | 28    | 302   | 271   | 333   | 537   | 497   | 577   |
| <b>2013</b>                             | 21    | 17    | 25    | 252   | 226   | 278   | 661   | 614   | 708   |

|                   |        |        |        |        |        |        |        |        |        |
|-------------------|--------|--------|--------|--------|--------|--------|--------|--------|--------|
| <b>2014</b>       | 21     | 18     | 24     | 157    | 140    | 174    | 766    | 715    | 816    |
| <b>2015</b>       | 22     | 18     | 26     | 167    | 148    | 185    | 784    | 733    | 835    |
| <b>2016</b>       | 23     | 20     | 27     | 203    | 179    | 226    | 820    | 767    | 873    |
| <b>2017</b>       | 34     | 29     | 40     | 259    | 231    | 286    | 858    | 795    | 921    |
| <b>Total cost</b> |        |        |        |        |        |        |        |        |        |
| <b>2010</b>       | 23,204 | 22,741 | 23,668 | 31,055 | 30,359 | 31,751 | 44,713 | 43,724 | 45,703 |
| <b>2011</b>       | 6,573  | 6,337  | 6,809  | 23,996 | 23,289 | 24,704 | 42,452 | 41,441 | 43,463 |
| <b>2012</b>       | 3,443  | 3,333  | 3,553  | 19,083 | 18,477 | 19,689 | 41,879 | 40,860 | 42,897 |
| <b>2013</b>       | 2,789  | 2,712  | 2,866  | 14,080 | 13,615 | 14,546 | 39,517 | 38,604 | 40,431 |
| <b>2014</b>       | 2,614  | 2,540  | 2,687  | 10,625 | 10,293 | 10,958 | 39,657 | 38,723 | 40,591 |
| <b>2015</b>       | 2,521  | 2,443  | 2,599  | 9,810  | 9,484  | 10,136 | 39,360 | 38,416 | 40,303 |
| <b>2016</b>       | 2,482  | 2,405  | 2,559  | 10,280 | 9,922  | 10,638 | 38,628 | 37,665 | 39,591 |
| <b>2017</b>       | 2,821  | 2,696  | 2,945  | 11,018 | 10,603 | 11,432 | 37,527 | 36,528 | 38,526 |

\* includes rehabilitation, complex continuing care and long-term care

\*\* includes same-day surgery, dialysis clinic visits and cancer clinic visits

\*\*\* includes outpatient prescriptions drugs for individuals covered under the public provincial drug plan (i.e., individuals 65 and older and those on social assistance)

**Note:** Costs are in 2018 CAD.

**Source:** Administrative health care data housed at ICES, Toronto Ontario



**Table A3.** Pooled multinomial logistic regression (with mood disorders): predictors of persistency in the high cost state among mental health high-cost patients (n = 393,511) in Ontario, 2010-2017

| Variable                             | Predictor       | Reference case     | Ratio of relative risk of persistent vs. sporadic high-cost patient (95% CI) | Ratio of relative risk of moderate vs. sporadic high-cost patient (95% CI) |
|--------------------------------------|-----------------|--------------------|------------------------------------------------------------------------------|----------------------------------------------------------------------------|
| <b>Sex</b>                           | Male            | Female             | 0.80<br>(0.76, 0.84)                                                         | 0.85<br>(0.81, 0.89)                                                       |
| <b>Age group</b>                     | 45-64           | 18-44              | 1.19<br>(1.13, 1.26)                                                         | 1.09<br>(1.04, 1.15)                                                       |
|                                      | 65-84           |                    | 1.71<br>(1.53, 1.91)                                                         | 1.48<br>(1.33, 1.65)                                                       |
|                                      | 85-105          |                    | 1.28<br>(0.97, 1.69)                                                         | 1.71<br>(1.34, 2.19)                                                       |
| <b>Migrant status</b>                | Immigrant       | Long-term resident | 0.59<br>(0.54, 0.65)                                                         | 0.80<br>(0.74, 0.88)                                                       |
|                                      | Refugee         |                    | 0.64<br>(0.55, 0.74)                                                         | 0.74<br>(0.64, 0.86)                                                       |
| <b>Neighbourhood income quintile</b> | 2 – medium low  | 1 - low            | 0.85<br>(0.82, 0.89)                                                         | 0.90<br>(0.86, 0.95)                                                       |
|                                      | 3 – medium      |                    | 0.76<br>(0.73, 0.81)                                                         | 0.88<br>(0.84, 0.92)                                                       |
|                                      | 4 – medium high |                    | 0.77<br>(0.73, 0.81)                                                         | 0.88<br>(0.83, 0.93)                                                       |
|                                      | 5 – high        |                    | 0.84<br>(0.80, 0.89)                                                         | 0.92<br>(0.87, 0.98)                                                       |
|                                      | Missing         |                    | 1.21<br>(0.98, 1.49)                                                         | 1.08<br>(0.87, 1.34)                                                       |
| <b>Rural residence</b>               | Yes             | No                 | 0.61<br>(0.56, 0.66)                                                         | 0.81<br>(0.76, 0.88)                                                       |
|                                      | Missing         |                    | 1.10<br>(0.78, 1.55)                                                         | 0.91<br>(0.62, 1.33)                                                       |
| <b>Rheumatoid arthritis</b>          | Yes             | No                 | 2.05                                                                         | 1.36                                                                       |

|                                     |                                            |                    |                      |                      |
|-------------------------------------|--------------------------------------------|--------------------|----------------------|----------------------|
|                                     |                                            |                    | (1.62, 2.59)         | (1.07, 1.73)         |
| <b>Asthma</b>                       | Yes                                        | No                 | 1.34<br>(1.26, 1.41) | 1.11<br>(1.04, 1.17) |
| <b>Cancer</b>                       | Yes                                        | No                 | 1.82<br>(1.62, 2.04) | 1.76<br>(1.58, 1.97) |
| <b>COPD</b>                         | Yes                                        | No                 | 1.71<br>(1.59, 1.82) | 1.40<br>(1.30, 1.50) |
| <b>Diabetes</b>                     | Yes                                        | No                 | 2.08<br>(1.95, 2.21) | 1.35<br>(1.26, 1.44) |
| <b>HIV</b>                          | Yes                                        | No                 | 4.29<br>(3.06, 6.01) | 2.47<br>(1.73, 3.53) |
| <b>Hypertension</b>                 | Yes                                        | No                 | 1.49<br>(1.41, 1.57) | 1.32<br>(1.25, 1.39) |
| <b>Congestive heart failure</b>     | Yes                                        | No                 | 2.25<br>(1.89, 2.68) | 1.85<br>(1.55, 2.20) |
| <b>Crohn's/colitis</b>              | Yes                                        | No                 | 2.15<br>(1.73, 2.67) | 1.61<br>(1.29, 2.02) |
| <b>Dementia</b>                     | Yes                                        | No                 | 3.25<br>(2.84, 3.73) | 2.03<br>(1.77, 2.32) |
| <b>Psychosis</b>                    | Yes                                        | No                 | 3.37<br>(3.21, 3.54) | 1.80<br>(1.72, 1.89) |
| <b>Mood disorders</b>               | Yes                                        | No                 | 1.15<br>(1.10, 1.21) | 1.14<br>(1.09, 1.19) |
| <b>Administrative health region</b> | 2 – South West                             | 1 – Erie St. Clair | 1.27<br>(1.11, 1.46) | 1.29<br>(1.12, 1.48) |
|                                     | 3 – Waterloo<br>Wellington                 |                    | 0.85<br>(0.73, 0.99) | 0.99<br>(0.85, 1.15) |
|                                     | 4 – Hamilton<br>Niagara Haldimand<br>Brant |                    | 1.01<br>(0.88, 1.15) | 1.13<br>(0.99, 1.29) |
|                                     | 5 – Central West                           |                    | 0.94<br>(0.80, 1.09) | 1.12<br>(0.96, 1.31) |
|                                     | 6 – Mississauga<br>Halton                  |                    | 0.97<br>(0.84, 1.13) | 1.14<br>(0.99, 1.32) |
|                                     | 7 – Toronto<br>Central                     |                    | 2.14<br>(1.89, 2.42) | 1.61<br>(1.42, 1.83) |

|             |                              |      |                      |                      |
|-------------|------------------------------|------|----------------------|----------------------|
|             | 8 – Central                  |      | 1.25<br>(1.10, 1.43) | 1.23<br>(1.08, 1.41) |
|             | 9 – Central East             |      | 1.15<br>(1.01, 1.31) | 1.16<br>(1.01, 1.32) |
|             | 10 – South East              |      | 1.26<br>(1.08, 1.47) | 1.19<br>(1.02, 1.40) |
|             | 11 – Champlain               |      | 1.50<br>(1.32, 1.71) | 1.42<br>(1.24, 1.62) |
|             | 12 – North Simcoe<br>Muskoka |      | 1.11<br>(0.95, 1.30) | 1.21<br>(1.03, 1.42) |
|             | 13 – North East              |      | 1.14<br>(0.99, 1.32) | 1.14<br>(0.99, 1.33) |
|             | 14 – North West              |      | 0.98<br>(0.80, 1.20) | 1.22<br>(1.01, 1.48) |
| <b>Year</b> | 2011                         | 2010 | 1.03<br>(1.03, 1.04) | 1.05<br>(1.04, 1.05) |
|             | 2012                         |      | 1.03<br>(1.03, 1.04) | 1.03<br>(1.02, 1.03) |
|             | 2013                         |      | 1.02<br>(1.02, 1.03) | 0.98<br>(0.97, 0.99) |
|             | 2014                         |      | 1.00<br>(0.99, 1.01) | 0.93<br>(0.92, 0.94) |
|             | 2015                         |      | 0.97<br>(0.96, 0.98) | 0.90<br>(0.89, 0.91) |
|             | 2016                         |      | 0.92<br>(0.91, 0.94) | 0.88<br>(0.87, 0.89) |
|             | 2017                         |      | 0.88<br>(0.87, 0.89) | 0.87<br>(0.85, 0.88) |

**Legend:** CI – confidence interval

**Source:** Administrative health care data housed at ICES, Toronto Ontario

**Table A4.** Pooled multinomial logistic regression (without decedents and individuals ineligible for public health care insurance coverage): predictors of persistency in the high cost state among mental health high-cost patients (n = 365,304) in Ontario, 2010-2017

| Variable                             | Predictor       | Reference case     | Ratio of relative risk of persistent vs. sporadic high-cost patient (95% CI) | Ratio of relative risk of moderate vs. sporadic high-cost patient (95% CI) |
|--------------------------------------|-----------------|--------------------|------------------------------------------------------------------------------|----------------------------------------------------------------------------|
| <b>Sex</b>                           | Male            | Female             | 0.79<br>(0.75, 0.83)                                                         | 0.82<br>(0.78, 0.86)                                                       |
| <b>Age group</b>                     | 45-64           | 18-44              | 1.17<br>(1.11, 1.24)                                                         | 1.07<br>(1.02, 1.13)                                                       |
|                                      | 65-84           |                    | 1.77<br>(1.57, 2.00)                                                         | 1.39<br>(1.23, 1.58)                                                       |
|                                      | 85-105          |                    | 2.78<br>(1.53, 5.03)                                                         | 1.08<br>(0.55, 2.11)                                                       |
| <b>Migrant status</b>                | Immigrant       | Long-term resident | 0.58<br>(0.53, 0.64)                                                         | 0.81<br>(0.74, 0.88)                                                       |
|                                      | Refugee         |                    | 0.62<br>(0.53, 0.72)                                                         | 0.73<br>(0.63, 0.85)                                                       |
| <b>Neighbourhood income quintile</b> | 2 – medium low  | 1 - low            | 0.85<br>(0.81, 0.89)                                                         | 0.89<br>(0.85, 0.94)                                                       |
|                                      | 3 – medium      |                    | 0.76<br>(0.72, 0.80)                                                         | 0.87<br>(0.83, 0.92)                                                       |
|                                      | 4 – medium high |                    | 0.76<br>(0.72, 0.81)                                                         | 0.86<br>(0.82, 0.91)                                                       |
|                                      | 5 – high        |                    | 0.83<br>(0.78, 0.88)                                                         | 0.91<br>(0.86, 0.97)                                                       |
|                                      | Missing         |                    | 1.28<br>(1.03, 1.60)                                                         | 1.07<br>(0.84, 1.35)                                                       |
| <b>Rural residence</b>               | Yes             | No                 | 0.60<br>(0.55, 0.65)                                                         | 0.83<br>(0.77, 0.90)                                                       |
|                                      | Missing         |                    | 0.99<br>(0.69, 1.41)                                                         | 0.87<br>(0.58, 1.30)                                                       |
| <b>Rheumatoid arthritis</b>          | Yes             | No                 | 2.07                                                                         | 1.33                                                                       |

|                                     |                                            |                    |                      |                      |
|-------------------------------------|--------------------------------------------|--------------------|----------------------|----------------------|
|                                     |                                            |                    | (1.61, 2.66)         | (1.02, 1.72)         |
| <b>Asthma</b>                       | Yes                                        | No                 | 1.35<br>(1.27, 1.43) | 1.10<br>(1.04, 1.17) |
| <b>Cancer</b>                       | Yes                                        | No                 | 1.83<br>(1.61, 2.08) | 1.70<br>(1.50, 1.93) |
| <b>COPD</b>                         | Yes                                        | No                 | 1.77<br>(1.65, 1.91) | 1.33<br>(1.24, 1.44) |
| <b>Diabetes</b>                     | Yes                                        | No                 | 2.14<br>(2.01, 2.29) | 1.32<br>(1.23, 1.41) |
| <b>HIV</b>                          | Yes                                        | No                 | 4.37<br>(3.08, 6.19) | 2.44<br>(1.68, 3.53) |
| <b>Hypertension</b>                 | Yes                                        | No                 | 1.50<br>(1.42, 1.59) | 1.32<br>(1.24, 1.39) |
| <b>Congestive heart failure</b>     | Yes                                        | No                 | 2.70<br>(2.16, 3.36) | 1.84<br>(1.46, 2.31) |
| <b>Crohn's/colitis</b>              | Yes                                        | No                 | 2.26<br>(1.80, 2.83) | 1.62<br>(1.28, 2.05) |
| <b>Dementia</b>                     | Yes                                        | No                 | 3.27<br>(2.77, 3.88) | 1.52<br>(1.27, 1.82) |
| <b>Psychosis</b>                    | Yes                                        | No                 | 3.49<br>(3.32, 3.67) | 1.82<br>(1.73, 1.91) |
| <b>Administrative health region</b> | 2 – South West                             | 1 – Erie St. Clair | 1.23<br>(1.07, 1.42) | 1.27<br>(1.09, 1.47) |
|                                     | 3 – Waterloo<br>Wellington                 |                    | 0.83<br>(0.71, 0.97) | 0.98<br>(0.84, 1.15) |
|                                     | 4 – Hamilton<br>Niagara Haldimand<br>Brant |                    | 0.97<br>(0.84, 1.11) | 1.12<br>(0.97, 1.29) |
|                                     | 5 – Central West                           |                    | 0.90<br>(0.77, 1.06) | 1.13<br>(0.96, 1.34) |
|                                     | 6 – Mississauga<br>Halton                  |                    | 0.94<br>(0.81, 1.09) | 1.14<br>(0.98, 1.33) |
|                                     | 7 – Toronto<br>Central                     |                    | 2.08<br>(1.83, 2.36) | 1.59<br>(1.39, 1.82) |
|                                     | 8 – Central                                |                    | 1.21<br>(1.05, 1.38) | 1.23<br>(1.07, 1.41) |

|             |                              |      |                      |                      |
|-------------|------------------------------|------|----------------------|----------------------|
|             | 9 – Central East             |      | 1.12<br>(0.98, 1.29) | 1.16<br>(1.00, 1.33) |
|             | 10 – South East              |      | 1.25<br>(1.06, 1.47) | 1.17<br>(0.98, 1.38) |
|             | 11 – Champlain               |      | 1.48<br>(1.30, 1.70) | 1.44<br>(1.25, 1.65) |
|             | 12 – North Simcoe<br>Muskoka |      | 1.09<br>(0.92, 1.29) | 1.20<br>(1.02, 1.43) |
|             | 13 – North East              |      | 1.12<br>(0.96, 1.31) | 1.13<br>(0.97, 1.33) |
|             | 14 – North West              |      | 0.97<br>(0.78, 1.20) | 1.19<br>(0.97, 1.46) |
| <b>Year</b> | 2011                         | 2010 | 0.96<br>(0.96, 0.96) | 0.98<br>(0.98, 0.98) |
|             | 2012                         |      | 0.92<br>(0.92, 0.93) | 0.97<br>(0.96, 0.97) |
|             | 2013                         |      | 0.89<br>(0.88, 0.89) | 0.95<br>(0.95, 0.96) |
|             | 2014                         |      | 0.85<br>(0.84, 0.86) | 0.94<br>(0.93, 0.94) |
|             | 2015                         |      | 0.82<br>(0.81, 0.83) | 0.92<br>(0.92, 0.93) |
|             | 2016                         |      | 0.79<br>(0.78, 0.80) | 0.91<br>(0.90, 0.92) |
|             | 2017                         |      | 0.77<br>(0.76, 0.78) | 0.90<br>(0.89, 0.91) |

**Legend:** CI – confidence interval

**Source:** Administrative health care data housed at ICES, Toronto Ontario

**Table A5.** Odds ratios of being a persistent mental health high-cost patient versus being a moderate and a sporadic mental health high-cost patient in Ontario, 2010-2017

| Variable                                                   | Persistent versus moderate high cost |             | Persistent versus sporadic high cost |             |
|------------------------------------------------------------|--------------------------------------|-------------|--------------------------------------|-------------|
|                                                            | Odds ratio                           | 95 CI       | Odds ratio                           | 95% CI      |
| <b>Sex (reference: male)</b>                               |                                      |             |                                      |             |
| Female                                                     | 0.93                                 | 0.89 - 0.97 | 0.81                                 | 0.78 - 0.85 |
| <b>Age group (reference: 18-44)</b>                        |                                      |             |                                      |             |
| Age group 45-64                                            | 1.11                                 | 1.06 - 1.17 | 1.18                                 | 1.12 - 1.25 |
| Age group 65-84                                            | 1.19                                 | 1.09 - 1.31 | 1.70                                 | 1.52 - 1.90 |
| Age group 85-105                                           | 0.77                                 | 0.63 - 0.95 | 1.28                                 | 0.95 - 1.72 |
| <b>Migrant status (reference: long-term resident)</b>      |                                      |             |                                      |             |
| Immigrant                                                  | 0.74                                 | 0.67 - 0.81 | 0.58                                 | 0.53 - 0.64 |
| Refugee                                                    | 0.87                                 | 0.75 - 1.01 | 0.64                                 | 0.55 - 0.74 |
| <b>Neighbourhood income quintile (reference: low)</b>      |                                      |             |                                      |             |
| Medium low                                                 | 0.95                                 | 0.91 - 0.99 | 0.85                                 | 0.81 - 0.89 |
| Medium                                                     | 0.87                                 | 0.83 - 0.91 | 0.77                                 | 0.73 - 0.81 |
| Medium high                                                | 0.88                                 | 0.83 - 0.93 | 0.76                                 | 0.72 - 0.81 |
| High                                                       | 0.92                                 | 0.87 - 0.97 | 0.83                                 | 0.78 - 0.88 |
| Missing                                                    | 1.10                                 | 0.92 - 1.32 | 1.21                                 | 0.97 - 1.50 |
| <b>Rural residence (reference: no)</b>                     |                                      |             |                                      |             |
| Yes                                                        | 0.74                                 | 0.69 - 0.80 | 0.61                                 | 0.56 - 0.66 |
| Missing                                                    | 1.21                                 | 0.90 - 1.63 | 1.05                                 | 0.74 - 1.49 |
| <b>Chronic condition (reference: not having condition)</b> |                                      |             |                                      |             |
| Arthritis                                                  | 1.53                                 | 1.26 - 1.86 | 2.03                                 | 1.60 - 2.58 |
| Asthma                                                     | 1.21                                 | 1.15 - 1.28 | 1.34                                 | 1.26 - 1.42 |
| Cancer                                                     | 1.04                                 | 0.95 - 1.13 | 1.81                                 | 1.61 - 2.04 |
| COPD                                                       | 1.21                                 | 1.15 - 1.29 | 1.70                                 | 1.59 - 1.83 |
| Diabetes                                                   | 1.54                                 | 1.46 - 1.63 | 2.08                                 | 1.96 - 2.22 |
| HIV                                                        | 1.73                                 | 1.34 - 2.25 | 4.36                                 | 3.10 - 6.15 |

|                                                           |         |             |         |             |
|-----------------------------------------------------------|---------|-------------|---------|-------------|
| Hypertension                                              | 1.13    | 1.08 - 1.19 | 1.48    | 1.40 - 1.57 |
| Congestive heart failure                                  | 1.22    | 1.09 - 1.36 | 2.29    | 1.91 - 2.74 |
| Crohn's/colitis                                           | 1.36    | 1.13 - 1.63 | 2.01    | 1.61 - 2.51 |
| Psychosis                                                 | 1.91    | 1.83 - 2.00 | 3.37    | 3.21 - 3.54 |
| Dementia                                                  | 1.60    | 1.46 - 1.75 | 3.35    | 2.92 - 3.85 |
| <b>Administrative health region (reference: region 1)</b> |         |             |         |             |
| Region 2                                                  | 0.99    | 0.87 - 1.13 | 1.27    | 1.10 - 1.45 |
| Region 3                                                  | 0.85    | 0.73 - 0.99 | 0.86    | 0.74 - 1.00 |
| Region 4                                                  | 0.90    | 0.79 - 1.02 | 1.01    | 0.88 - 1.16 |
| Region 5                                                  | 0.83    | 0.72 - 0.97 | 0.95    | 0.81 - 1.12 |
| Region 6                                                  | 0.87    | 0.75 - 1.00 | 0.99    | 0.85 - 1.15 |
| Region 7                                                  | 1.36    | 1.20 - 1.53 | 2.12    | 1.87 - 2.40 |
| Region 8                                                  | 1.03    | 0.90 - 1.17 | 1.28    | 1.12 - 1.46 |
| Region 9                                                  | 1.01    | 0.89 - 1.14 | 1.15    | 1.00 - 1.31 |
| Region 10                                                 | 1.05    | 0.90 - 1.23 | 1.28    | 1.09 - 1.50 |
| Region 11                                                 | 1.07    | 0.94 - 1.21 | 1.47    | 1.29 - 1.68 |
| Region 12                                                 | 0.92    | 0.78 - 1.07 | 1.12    | 0.95 - 1.32 |
| Region 13                                                 | 0.99    | 0.86 - 1.15 | 1.18    | 1.02 - 1.38 |
| Region 14                                                 | 0.82    | 0.67 - 1.00 | 0.98    | 0.80 - 1.20 |
| <b>Year (reference: 2010)</b>                             |         |             |         |             |
| 2011                                                      | 0.98    | 0.97 - 0.98 | 1.05    | 1.04 - 1.05 |
| 2012                                                      | 1.00    | 0.99 - 1.00 | 1.05    | 1.04 - 1.05 |
| 2013                                                      | 1.03    | 1.02 - 1.04 | 1.03    | 1.02 - 1.03 |
| 2014                                                      | 1.06    | 1.05 - 1.07 | 0.99    | 0.98 - 1.00 |
| 2015                                                      | 1.06    | 1.05 - 1.07 | 0.96    | 0.95 - 0.97 |
| 2016                                                      | 1.03    | 1.02 - 1.05 | 0.92    | 0.91 - 0.93 |
| 2017                                                      | 1.01    | 0.99 - 1.02 | 0.88    | 0.87 - 0.90 |
| <b>N</b>                                                  | 264,054 |             | 271,843 |             |

**Legend:** CI – confidence interval

**Source:** Administrative health care data housed at ICES, Toronto Ontario
